# Supplementary material
Source: PubMed Central journal article supplement (PMC11602381)
Supplement: NIHMS2029479-supplement-Supplementary_figures.pdf [file NIHMS2029479-supplement-Supplementary_figures.pdf]

## MALES

2 days 2 wks 4 wks separation

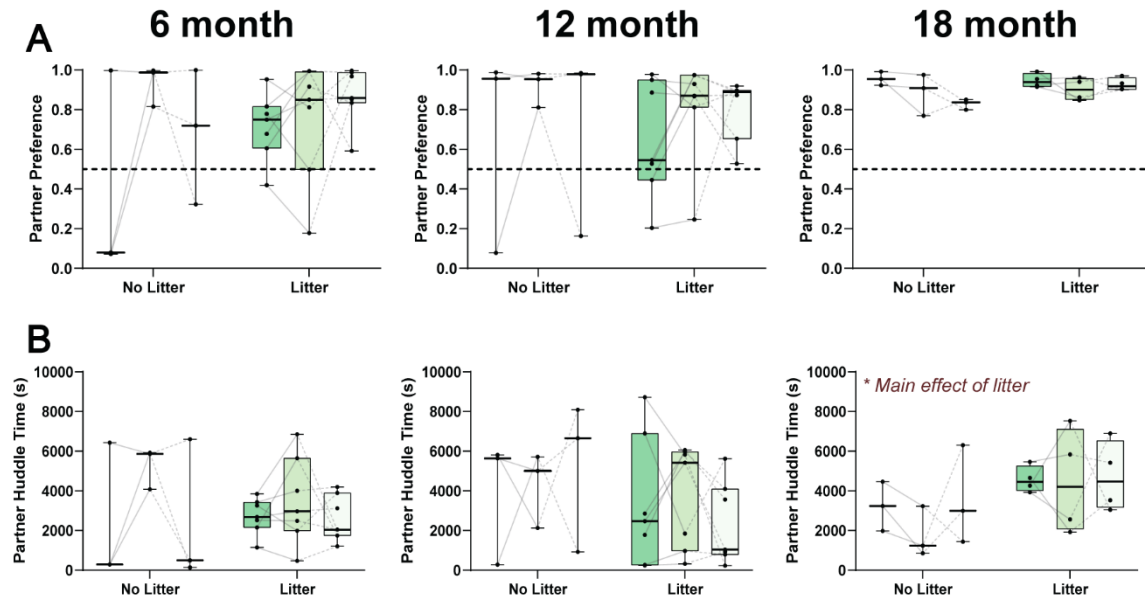

## FEMALES

2 days 2 wks 4 wks separation

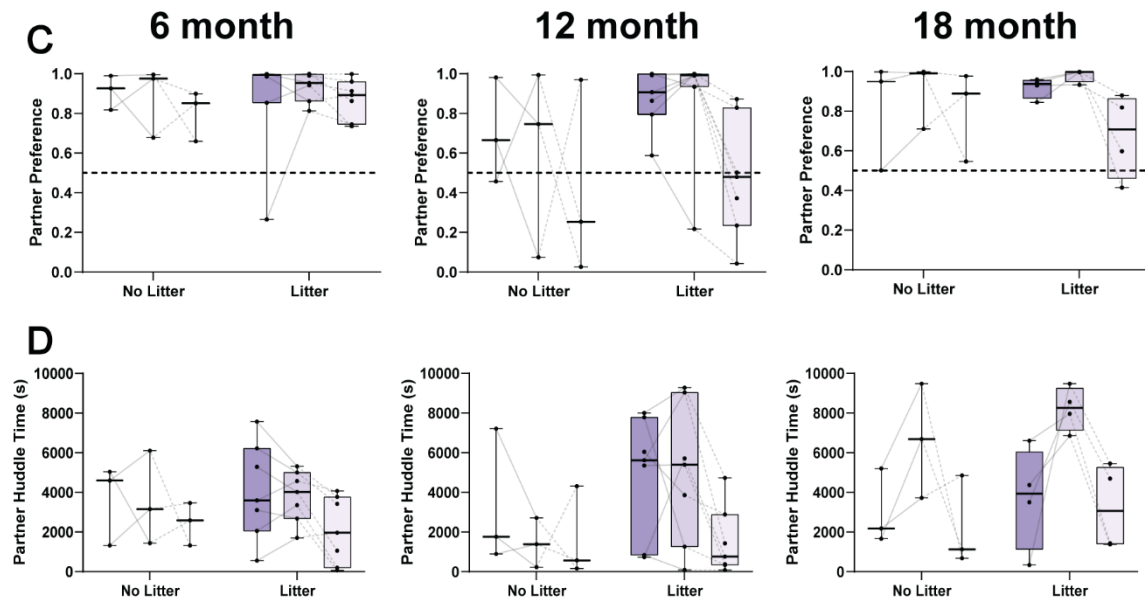

Supplemental Figure 1. Lack of major effects of reproductive success on pair bonding metrics. A) Partner preference scores in male 6-, 12-, and 18-month voles as a function of reproductive success, which revealed no significant differences. B) Partner huddle time in male 6-, 12-, and 18-month voles as a function of reproductive success. Only 18-month males demonstrated a difference in partner huddle time such that those with litters huddled more with

their partners compared to those without litters. C) Partner preference scores in female 6-, 12-, and 18-month voles as a function of reproductive success, which revealed no significant differences. D) Partner huddle time in female 6-, 12-, and 18-month voles as a function of reproductive success, which also revealed no significant differences. n=3-7 animals per group; \*p<0.05.

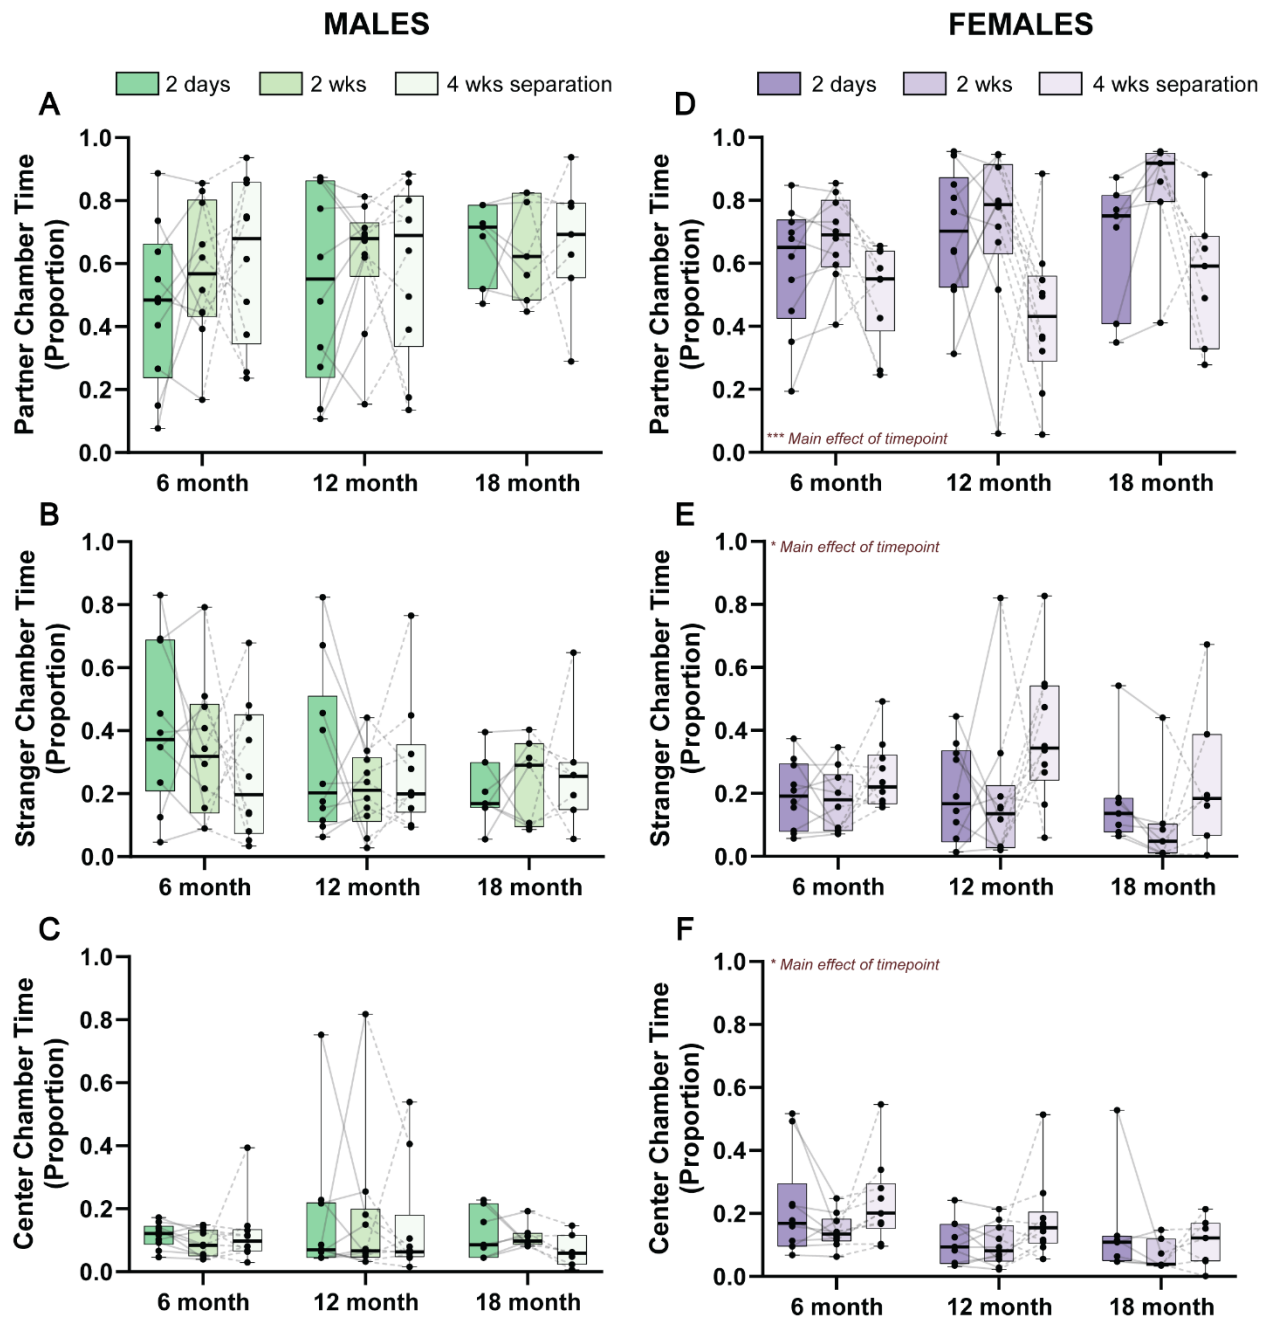

Supplemental Figure 2. Effects of age and timepoint on proportion of time animals spent in different areas of the partner preference arena. Males across age and timepoint do not spend a greater or less proportion of their time in the A) partner, B) stranger, or C) center chamber of the partner preference arena. D) Female animals spent a greater proportion of time in the partner chamber after 2 wks cohabitation and less after 4 wks separation. E) These effects were mirrored in the opposite direction when observing proportion of time spent in the stranger chamber. F) With increasing age, there was a gradually decreasing proportion of time spent in the center chamber during the partner preference task in female animals. N=7-10 animals per group; \* $p < 0.05$ , \*\*\* $p < 0.001$ .

Supplemental Table 1: 12-month Free Interaction 15 Minute Time Bin Statistics

| 12-months |                             |              |            |                   |
|-----------|-----------------------------|--------------|------------|-------------------|
| Time Bin  | Test                        | q statistic  | df         | p value           |
| 1         | 2 days vs. 2 wks            | 1.777        | 198        | 0.4215            |
|           | 2 days vs. 4 wks sep        | 2.851        | 198        | 0.1110            |
|           | 2 wks vs. 4 wks sep         | 1.074        | 198        | 0.7284            |
| 2         | 2 days vs. 2 wks            | 0.9542       | 198        | 0.7785            |
|           | 2 days vs. 4 wks sep        | 2.370        | 198        | 0.2170            |
|           | 2 wks vs. 4 wks sep         | 1.416        | 198        | 0.5769            |
| 3         | 2 days vs. 2 wks            | 1.128        | 198        | 0.7049            |
|           | 2 days vs. 4 wks sep        | 3.121        | 198        | 0.0725            |
|           | <b>2 wks vs. 4 wks sep</b>  | <b>4.249</b> | <b>198</b> | <b>0.0084</b>     |
| 4         | 2 days vs. 2 wks            | 1.188        | 198        | 0.6787            |
|           | 2 days vs. 4 wks sep        | 3.162        | 198        | 0.0677            |
|           | 2 wks vs. 4 wks sep         | 1.975        | 198        | 0.3448            |
| 5         | 2 days vs. 2 wks            | 1.808        | 198        | 0.4091            |
|           | <b>2 days vs. 4 wks sep</b> | <b>5.212</b> | <b>198</b> | <b>0.0009</b>     |
|           | <b>2 wks vs. 4 wks sep</b>  | <b>3.404</b> | <b>198</b> | <b>0.0446</b>     |
| 6         | 2 days vs. 2 wks            | 1.491        | 198        | 0.5436            |
|           | <b>2 days vs. 4 wks sep</b> | <b>3.970</b> | <b>198</b> | <b>0.0151</b>     |
|           | 2 wks vs. 4 wks sep         | 2.478        | 198        | 0.1885            |
| 7         | 2 days vs. 2 wks            | 2.392        | 198        | 0.2110            |
|           | <b>2 days vs. 4 wks sep</b> | <b>5.575</b> | <b>198</b> | <b>0.0003</b>     |
|           | 2 wks vs. 4 wks sep         | 3.183        | 198        | 0.0654            |
| 8         | 2 days vs. 2 wks            | 1.784        | 198        | 0.4186            |
|           | <b>2 days vs. 4 wks sep</b> | <b>5.514</b> | <b>198</b> | <b>0.0004</b>     |
|           | <b>2 wks vs. 4 wks sep</b>  | <b>3.730</b> | <b>198</b> | <b>0.0244</b>     |
| 9         | <b>2 days vs. 2 wks</b>     | <b>5.000</b> | <b>198</b> | <b>0.0015</b>     |
|           | <b>2 days vs. 4 wks sep</b> | <b>9.138</b> | <b>198</b> | <b>&lt;0.0001</b> |
|           | <b>2 wks vs. 4 wks sep</b>  | <b>4.139</b> | <b>198</b> | <b>0.0106</b>     |
| 10        | <b>2 days vs. 2 wks</b>     | <b>5.244</b> | <b>198</b> | <b>0.0008</b>     |
|           | <b>2 days vs. 4 wks sep</b> | <b>10.22</b> | <b>198</b> | <b>&lt;0.0001</b> |
|           | <b>2 wks vs. 4 wks sep</b>  | <b>4.974</b> | <b>198</b> | <b>0.0016</b>     |
| 11        | 2 days vs. 2 wks            | 1.426        | 198        | 0.5725            |
|           | <b>2 days vs. 4 wks sep</b> | <b>8.550</b> | <b>198</b> | <b>&lt;0.0001</b> |
|           | <b>2 wks vs. 4 wks sep</b>  | <b>7.124</b> | <b>198</b> | <b>&lt;0.0001</b> |
| 12        | 2 days vs. 2 wks            | 0.2429       | 198        | 0.9839            |
|           | <b>2 days vs. 4 wks sep</b> | <b>9.268</b> | <b>198</b> | <b>&lt;0.0001</b> |
|           | <b>2 wks vs. 4 wks sep</b>  | <b>9.511</b> | <b>198</b> | <b>&lt;0.0001</b> |
